# Supplementary material for: Enhancement of Secondary Organic Aerosol Formation and itsOxidation State by SO 2 during Photooxidation of 2-Methoxyphenol
Source: Copernicus journal article supplement (doi:10.5194/acp-2018-1000), 2018-10-09
Supplement: Supplementary file 1 [file acp-2018-1000-supplement.pdf]

1 *Supporting information for:*

2 **Enhancement of Secondary Organic Aerosol Formation and its**  
3 **Oxidation State by SO<sub>2</sub> during Photooxidation of 2-Methoxyphenol**

4 Changgeng Liu<sup>1,2,a</sup>, Tianzeng Chen<sup>1,4,a</sup>, Yongchun Liu<sup>1,4,5,\*</sup>, Jun Liu<sup>1,4</sup>, Hong He<sup>1,3,4,\*</sup>,  
5 Peng Zhang<sup>1,4</sup>

6 <sup>1</sup>State Key Joint Laboratory of Environment Simulation and Pollution Control,  
7 Research Center for Eco-Environmental Sciences, Chinese Academy of Sciences,  
8 Beijing 100085, China

9 <sup>2</sup>School of Biological and Chemical Engineering, Panzhihua University, Panzhihua  
10 617000, China

11 <sup>3</sup>Center for Excellence in Regional Atmospheric Environment, Institute of Urban  
12 Environment, Chinese Academy of Sciences, Xiamen 361021, China

13 <sup>4</sup>University of Chinese Academy of Sciences, Beijing 100049, China

14 <sup>5</sup>Beijing Advanced Innovation Center for Soft Matter Science and Engineering,  
15 Beijing University of Chemical Technology, Beijing 100029, China

16 <sup>a</sup>These authors contributed equally to this work and should be considered as co-first  
17 authors

18 *Correspondence to:* Yongchun Liu (liuyc@buct.edu.cn) and Hong He  
19 (honghe@rcees.ac.cn)

20 **Chemicals**

21 Guaiacol (Sigma-Aldrich, >99%), sodium chloride (Sinopharm Chemical  
22 Reagent Co., Ltd., >99.8%), and ammonium sulfate (Sinopharm Chemical Reagent  
23 Co., Ltd., >99%) were used in the experiments as received. NO (963 ppm) and SO<sub>2</sub>  
24 (3000 ppm) were purchased from Beijing Huayuan Gas Chemical Industry Co., Ltd.

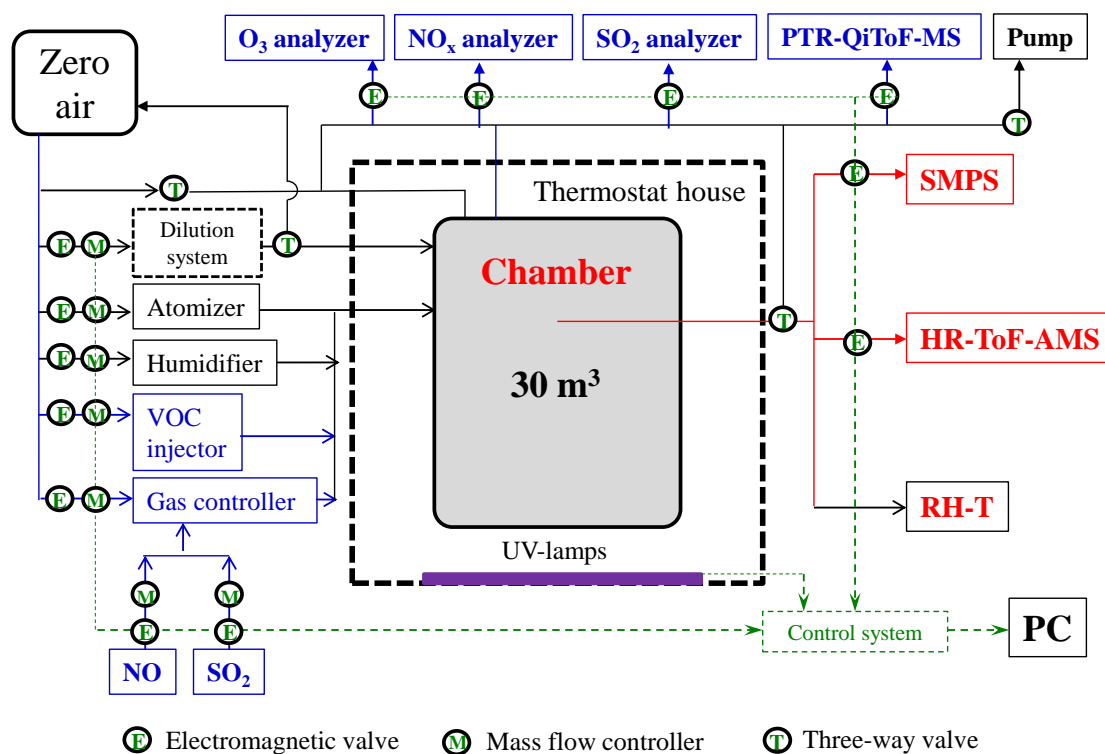

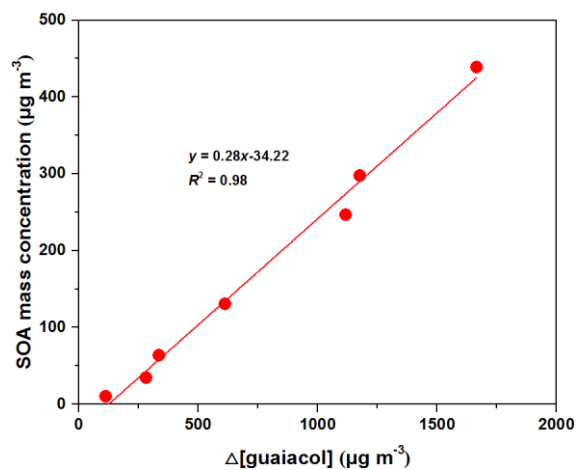

27

28 **Figure S2.** SOA mass concentration ( $M_0$ ) vs. the consumed guaiacol concentration

29 ( $\Delta[\text{guaiacol}]$ ). Each data point represents a separate experiment.

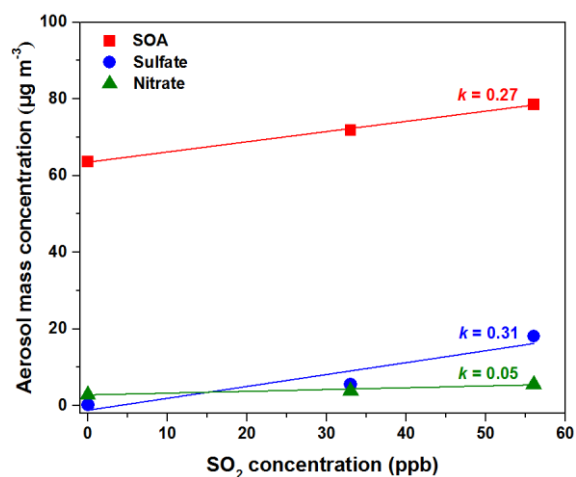

30

31 **Figure S3.** Foramtion of SOA, sulfate, and nitrate as a function of  $\text{SO}_2$  concentration

32 for guaiacol photooxidation. The  $k$  values are the slopes of the fitted lines for each

33 species.

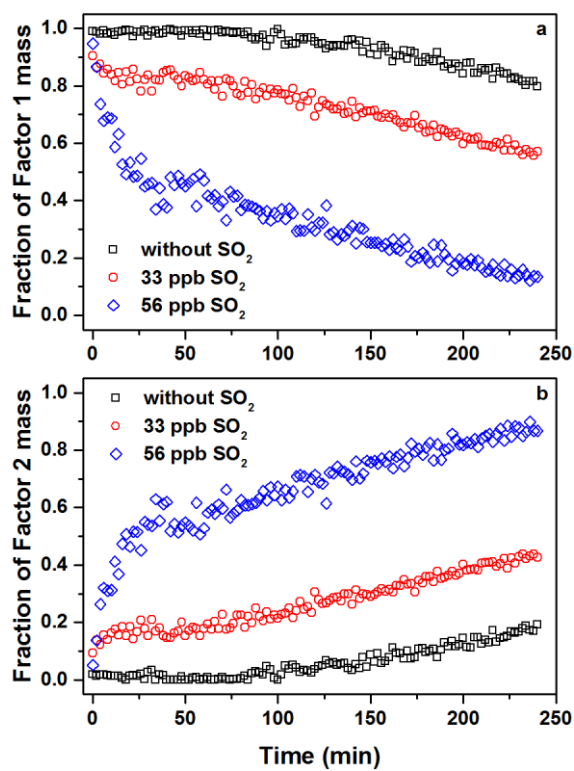

34

35 **Figure S4.** Time-dependent curves of Factor 1 (a) and Factor 2 (b) at three different

36 SO<sub>2</sub> concentrations.

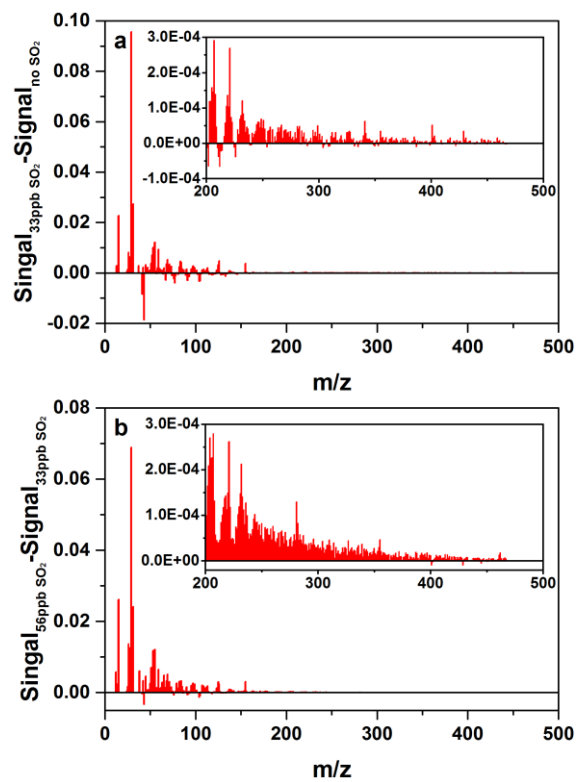

37

38 **Figure S5.** Differences among the normalized mass spectra of SOA formed at

39 different SO<sub>2</sub> concentrations (a: 33 ppb SO<sub>2</sub> – no SO<sub>2</sub>; b: 56 ppb SO<sub>2</sub> – 33 ppb SO<sub>2</sub>).

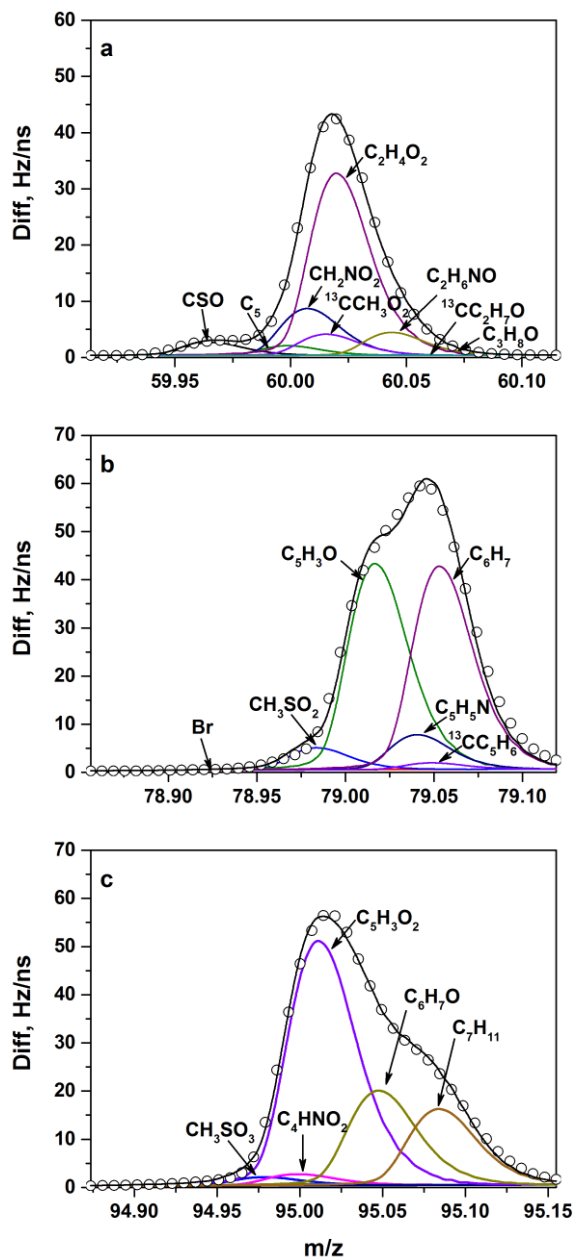

40

41 **Figure S6.** Fitted peaks of average W-mode mass spectrum of methyl sulfate obtained

42 at 56 ppb  $SO_2$  without seed particles.

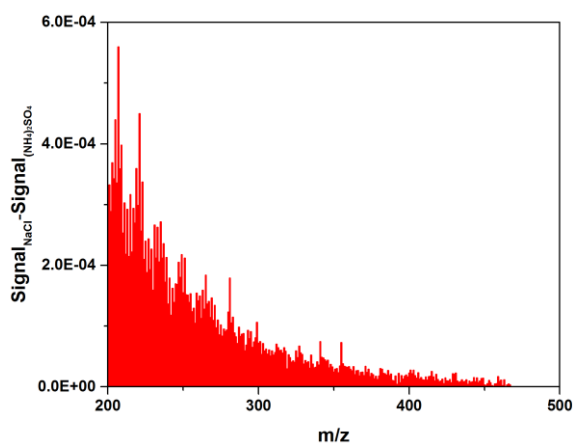

43

44 **Figure S7.** Difference between the normalized mass spectra of SOA formed with  
 45 different seeds (NaCl seeded SOA –  $(\text{NH}_4)_2\text{SO}_4$  seeded SOA).

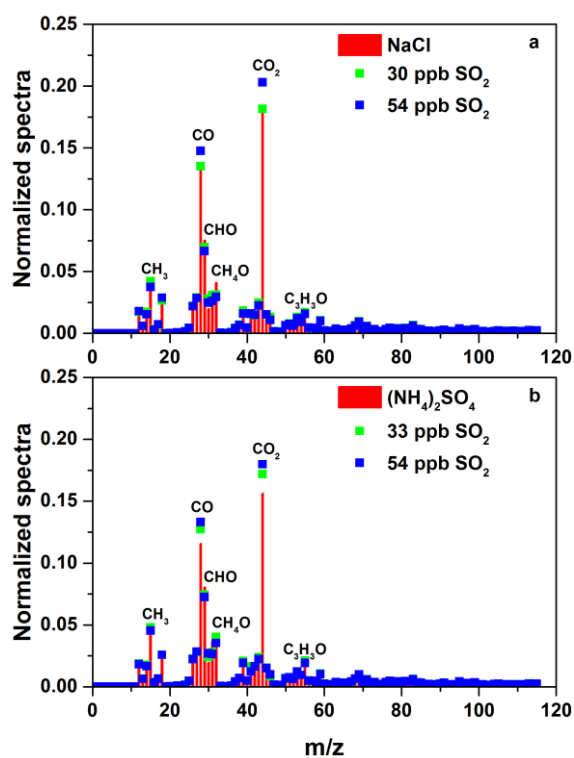

46

47 **Figure S8.** Mass spectra of SOA with NaCl (a) and  $(\text{NH}_4)_2\text{SO}_4$  (b) as seed particles  
 48 obtained by HR-ToF-AMS at different  $\text{SO}_2$  concentration (red bars: without  $\text{SO}_2$ ; olive  
 49 markers: 30 ppb  $\text{SO}_2$  for a and 33 ppb  $\text{SO}_2$  for b; blue markers: 54 ppb  $\text{SO}_2$ ).

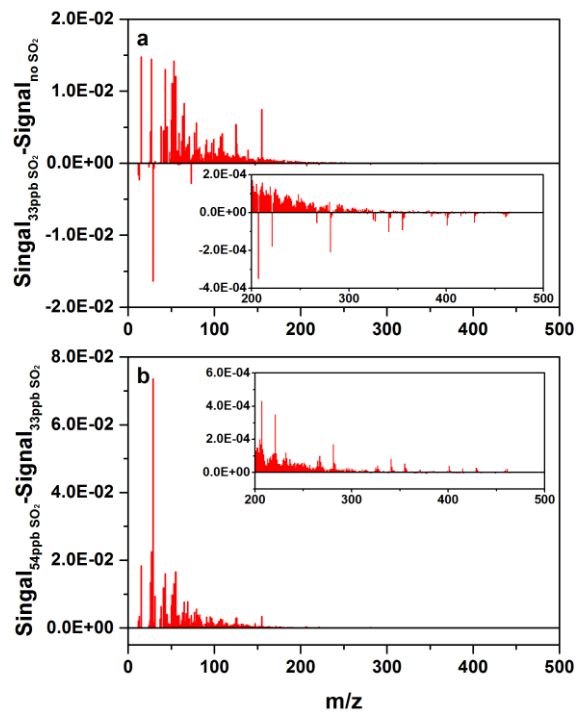

50

51 **Figure S9.** Differences among the normalized mass spectra of SOA formed at  
 52 different SO<sub>2</sub> concentrations with (NH<sub>4</sub>)<sub>2</sub>SO<sub>4</sub> seed particles (a: 33 ppb SO<sub>2</sub> – no SO<sub>2</sub>;  
 53 b: 54 ppb SO<sub>2</sub> – 33 ppb SO<sub>2</sub>).



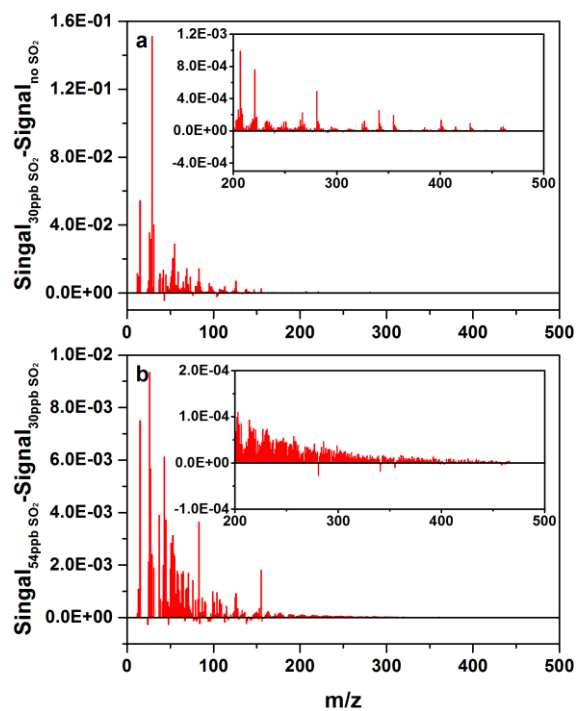

54

55 **Figure S10.** Differences among the normalized mass spectra of SOA formed at  
 56 different SO<sub>2</sub> concentrations with NaCl seed particles (a: 30 ppb SO<sub>2</sub> – no SO<sub>2</sub>; b: 54  
 57 ppb SO<sub>2</sub> – 30 ppb SO<sub>2</sub>).
